# Supplementary material for: Cancer Cells Hijack PRC2 to Modify Multiple Cytokine Pathways
Source: PLoS One. 2015 Jun 1;10(6):e0126466. doi: 10.1371/journal.pone.0126466 (PMC4450877; doi:10.1371/journal.pone.0126466)
Supplement: S3 Table — (XLSX) [file pone.0126466.s004.xlsx]

## Sheet: Supp T3_Antibodies
Supp Table 3. List of antibodies and kits used in WB, ELISA and ChIP assays
Target	Application	Company	Cat Number
H3	WB, ChIP	Abcam	ab1791
H3K4Me1	ChIP	Abcam	ab8895
H3K4Me2	ChIP	Millipore	07-030
H3K9Me3	ChIP	Millipore	07-442
H3K27Me2	ChIP	Millipore	07-452
H3K27Me3	WB, ChIP	Millipore	07-449
H3K27Ac	WB, ChIP	Abcam	ab4729
H3K79Me3	WB, ChIP	Abcam	ab2621
H4	ChIP	Abcam	ab10158
SUZ12	WB, ChIP	Abcam	ab12073
EZH2	WB	BD	612666
EZH2 (ENX-1)(H-80)	ChIP	Santa Cruz Biotech.	sc-25383
hBrm (N-19)	WB	Santa Cruz Biotech.	sc-6450
STAT1	WB	Millipore	06-501
p-STAT1	WB	Cell-Signalling	91715
IRF1 (c-20)	WB	Santa Cruz Biotech.	sc-497
Tubulin	WB	Sigma	T-9026
Goat anti Rabbit	WB	Odyssey	926-32211
Goat anti Mouse	WB	Odyssey	926-32220
IL6 ELISA kit	ELISA	Biolegend	430504
IL8 ELISA kit	ELISA	Biolegend	431504
CXCL10 ELISA kit	ELISA	Biolegend	439904
TNFa	ELISA	Biolegend	570102
IFNg	ELISA	Life technologies	PHC4031
IL1b	ELISA	Biolegend	579402
LPS (E.coli)	ELISA	Sigma	L6529-1MG
